# Supplementary material
Source: HighWire-hosted journal article supplement (http://www.cmaj.ca/highwire/filestream/58182/field_highwire_adjunct_files/2/meta-van-3-at_online.pdf)
Supplement: meta-van-3-at_online.pdf [file meta-van-3-at_online.pdf]

**Appendix 3:** Type of hemorrhagic and thromboembolic events included in each study and the criteria required for each event (part 1 of 5)

| Study                  | No. of patients | Event characteristics                                                                                     |                                                                                                  |                                                                                                           |                                                        |                                          |                                                        |           |                                                                                                           |
|------------------------|-----------------|-----------------------------------------------------------------------------------------------------------|--------------------------------------------------------------------------------------------------|-----------------------------------------------------------------------------------------------------------|--------------------------------------------------------|------------------------------------------|--------------------------------------------------------|-----------|-----------------------------------------------------------------------------------------------------------|
|                        |                 | Gastrointestinal                                                                                          | Intracranial                                                                                     | Urogenital                                                                                                | Ocular                                                 | Retroperitoneal                          | Muscular hematoma                                      | Articular | Other hemorrhages                                                                                         |
| Hutten <sup>1</sup>    | 1 303           | Hemoglobin reduction of 2 g/dL or more, transfusion required or discontinuation of anticoagulant required | Confirmed by objective diagnostic tests†                                                         | Hemoglobin reduction of 2 g/dL or more, transfusion required or discontinuation of anticoagulant required |                                                        | Confirmed by objective diagnostic tests† |                                                        |           | Hemoglobin reduction of 2 g/dL or more, transfusion required or discontinuation of anticoagulant required |
| Yasaka <sup>2</sup>    | 203             | Admission to hospital required or transfusion required                                                    | Admission to hospital required or transfusion required                                           |                                                                                                           | Admission to hospital required or transfusion required |                                          |                                                        |           | Admission to hospital required or transfusion required                                                    |
| EAF <sup>3</sup>       | 214             | Admission to hospital and transfusion required, or permanent disability due to hemorrhagic event          | Admission to hospital and transfusion required, or permanent disability due to hemorrhagic event | Admission to hospital and transfusion required, or permanent disability due to hemorrhagic event          |                                                        |                                          |                                                        |           | Admission to hospital and transfusion required, or permanent disability due to hemorrhagic event          |
| Chimowitz <sup>4</sup> | 289             | Admission to hospital, transfusion or surgery required                                                    | Confirmed by objective diagnostic tests†                                                         | Admission to hospital, transfusion or surgery required                                                    | Admission to hospital, transfusion or surgery required |                                          | Admission to hospital, transfusion or surgery required |           | Admission to hospital, transfusion or surgery required                                                    |
| Andersen <sup>5*</sup> | 204             |                                                                                                           |                                                                                                  |                                                                                                           |                                                        |                                          |                                                        |           |                                                                                                           |
| Torn <sup>6</sup>      | 356             | Admission to hospital required                                                                            | Confirmed by objective diagnostic tests†                                                         | Admission to hospital required                                                                            |                                                        |                                          |                                                        |           | Admission to hospital required                                                                            |
| Cheung <sup>7</sup>    | 555             | Transfusion required                                                                                      | Transfusion required                                                                             |                                                                                                           |                                                        |                                          |                                                        |           |                                                                                                           |
| ESPRIT <sup>8</sup>    | 536             |                                                                                                           | Confirmed by objective diagnostic tests†                                                         |                                                                                                           |                                                        |                                          |                                                        |           | Admission to hospital required                                                                            |

**Appendix 3:** Type of hemorrhagic and thromboembolic events included in each study and the criteria required for each event (part 2 of 5)

| Study                        | No. of patients | Event characteristics                                                      |                                                |                                                                            |                                          |                                                                            |                                                                            |                                                                            |                                                                            |
|------------------------------|-----------------|----------------------------------------------------------------------------|------------------------------------------------|----------------------------------------------------------------------------|------------------------------------------|----------------------------------------------------------------------------|----------------------------------------------------------------------------|----------------------------------------------------------------------------|----------------------------------------------------------------------------|
|                              |                 |                                                                            |                                                |                                                                            |                                          |                                                                            |                                                                            |                                                                            |                                                                            |
| Poli <sup>9</sup>            | 903             | Surgery or transfusion required or hemoglobin reduction of 2 g/dL or more  | Confirmed by objective diagnostic tests†       |                                                                            | Blindness due to hemorrhagic event       | Surgery or transfusion required or hemoglobin reduction of 2 g/dL or more  |                                                                            | Surgery or transfusion required or hemoglobin reduction of 2 g/dL or more  | Surgery or transfusion required or hemoglobin reduction of 2 g/dL or more  |
| Tangelder <sup>10</sup>      | 1 326           | Admission to hospital required                                             | Admission to hospital required                 | Admission to hospital required                                             |                                          |                                                                            |                                                                            |                                                                            | Admission to hospital required                                             |
| Kearon <sup>11</sup>         | 738             | Admission to hospital or transfusion required                              |                                                |                                                                            |                                          | Admission to hospital or transfusion required                              | Admission to hospital or transfusion required                              |                                                                            | Admission to hospital or transfusion required                              |
| Casais <sup>12</sup>         | 811             | Admission to hospital and transfusion required                             | Admission to hospital and transfusion required |                                                                            | Blindness due to hemorrhagic event       |                                                                            | Admission to hospital and transfusion required                             |                                                                            | Admission to hospital and transfusion required                             |
| Palareti <sup>13</sup>       | 2 745           | Surgery or transfusion required, or hemoglobin reduction of 2 g/dL or more | Confirmed by objective diagnostic tests†       | Surgery or transfusion required, or hemoglobin reduction of 2 g/dL or more | Blindness due to hemorrhagic event       | Surgery or transfusion required, or hemoglobin reduction of 2 g/dL or more | Surgery or transfusion required, or hemoglobin reduction of 2 g/dL or more | Surgery or transfusion required, or hemoglobin reduction of 2 g/dL or more | Surgery or transfusion required, or hemoglobin reduction of 2 g/dL or more |
| Van Walraven <sup>14</sup>   | 10 020          | Admission to hospital required                                             | Admission to hospital required                 | Admission to hospital required                                             |                                          | Admission to hospital required                                             |                                                                            |                                                                            |                                                                            |
| Azar <sup>15</sup>           | 1 700           | Admission to hospital required                                             | Confirmed by objective diagnostic tests†       |                                                                            |                                          |                                                                            | Admission to hospital required                                             |                                                                            | Admission to hospital required                                             |
| Hylek <sup>16</sup>          | 13 559          |                                                                            | Confirmed by objective diagnostic tests†       |                                                                            |                                          |                                                                            |                                                                            |                                                                            |                                                                            |
| Oden <sup>17</sup>           | 42 451          |                                                                            |                                                |                                                                            |                                          |                                                                            |                                                                            |                                                                            | Fatal events only                                                          |
| <b>Thromboembolic events</b> |                 | Ischemic stroke                                                            | Myocardial infarction                          | Transient ischemic attack                                                  | Deep vein thrombosis                     | Pulmonary embolism                                                         | Systemic embolism                                                          | Recurrent venous thromboembolism                                           | Thromboses of prosthetic valve                                             |
| Rosove <sup>18</sup>         | 55              | Confirmed by objective diagnostic tests†                                   | Confirmed by objective diagnostic tests†       | Confirmed by objective diagnostic tests†                                   | Confirmed by objective diagnostic tests† | Confirmed by objective diagnostic tests†                                   |                                                                            |                                                                            |                                                                            |
| Hutten <sup>1</sup>          | 1 303           |                                                                            |                                                |                                                                            |                                          |                                                                            |                                                                            | Confirmed by objective diagnostic tests†                                   |                                                                            |

**Appendix 3:** Type of hemorrhagic and thromboembolic events included in each study and the criteria required for each event (part 3 of 5)

| Study                  | No. of patients | Event characteristics                                                                                          |                                                                                                                                                            |                                                    |
|------------------------|-----------------|----------------------------------------------------------------------------------------------------------------|------------------------------------------------------------------------------------------------------------------------------------------------------------|----------------------------------------------------|
|                        |                 |                                                                                                                |                                                                                                                                                            |                                                    |
| Yasaka <sup>2</sup>    | 203             | NIH stroke scale scores used to assess events                                                                  | NIH stroke scale scores used to assess events                                                                                                              | NIH stroke scale scores used to assess events      |
| EAF <sup>3</sup>       | 214             | Confirmed by objective diagnostic tests†                                                                       | History of chest discomfort, specific cardiac enzyme levels more than twice the upper limit of normal or development of Q waves on a standard 12-lead ECG‡ | Confirmed by objective diagnostic tests†           |
| Chimowitz <sup>4</sup> | 289             | Focal neurologic deficit of sudden onset that lasted at least 24 h and confirmed by objective diagnostic tests |                                                                                                                                                            |                                                    |
| Andersen <sup>5*</sup> | 204             |                                                                                                                |                                                                                                                                                            |                                                    |
| Torn <sup>6</sup>      | 356             | Confirmed by objective diagnostic tests†                                                                       | History of chest discomfort, specific cardiac enzyme levels more than twice the upper limit of normal or development of Q waves on a standard 12-lead ECG‡ | Confirmed by objective diagnostic tests†           |
| Cheung <sup>7</sup>    | 555             | Not reported                                                                                                   |                                                                                                                                                            | Vascular insufficiency of limbs or internal organs |

**Appendix 3:** Type of hemorrhagic and thromboembolic events included in each study and the criteria required for each event (part 4 of 5)

| Study                      | No. of patients | Event characteristics                                                                                                                                                                 |                                                                                                                                                            |                                |                                |                                |                                          |
|----------------------------|-----------------|---------------------------------------------------------------------------------------------------------------------------------------------------------------------------------------|------------------------------------------------------------------------------------------------------------------------------------------------------------|--------------------------------|--------------------------------|--------------------------------|------------------------------------------|
|                            |                 |                                                                                                                                                                                       |                                                                                                                                                            |                                |                                |                                |                                          |
| ESPRIT <sup>8</sup>        | 536             | Focal neurologic deficit of sudden onset that lasted at least 24 h, confirmed by objective diagnostic tests and increase in handicap of at least 1 grade on the modified Rankin scale | History of chest discomfort, specific cardiac enzyme levels more than twice the upper limit of normal or development of Q waves on a standard 12-lead ECG‡ |                                |                                |                                |                                          |
| Poli <sup>9</sup>          | 903             | Not reported                                                                                                                                                                          | Not reported                                                                                                                                               | Not reported                   | Not reported                   | Not reported                   | Not reported                             |
| Tangelder <sup>10</sup>    | 1 326           | Focal neurologic deficit of sudden onset that lasted at least 24 h and increase in handicap of at least 1 grade on the modified Rankin scale                                          | History of chest discomfort, specific cardiac enzyme levels more than twice the upper limit of normal or development of Q waves on a standard 12-lead ECG‡ |                                |                                |                                |                                          |
| Kearon <sup>11</sup>       | 738             |                                                                                                                                                                                       |                                                                                                                                                            |                                |                                |                                | Confirmed by objective diagnostic tests† |
| Palareti <sup>19</sup>     | 2 745           | Not reported                                                                                                                                                                          | Not reported                                                                                                                                               | Not reported                   | Not reported                   |                                | Not reported                             |
| Van Walraven <sup>14</sup> | 10 020          | Admission to hospital required                                                                                                                                                        | Admission to hospital required                                                                                                                             | Admission to hospital required | Admission to hospital required | Admission to hospital required |                                          |
| Azar <sup>15</sup>         | 1 700           | Confirmed by objective diagnostic tests†                                                                                                                                              | History of chest discomfort, specific cardiac enzyme levels more than twice the upper limit of normal or development of Q waves on a standard 12-lead ECG‡ |                                |                                | Not reported                   |                                          |

**Appendix 3:** Type of hemorrhagic and thromboembolic events included in each study and the criteria required for each event (part 5 of 5)

| Study               | No. of patients | Event characteristics                                              |
|---------------------|-----------------|--------------------------------------------------------------------|
| Hylek <sup>16</sup> | 13 559          | Focal neurologic deficit of sudden onset that lasted at least 24 h |

Note: EAFT = European Atrial Fibrillation Trial Study Group, ECG = electrocardiogram, ESPRIT = European and Australian Stroke Prevention in Reversible Ischaemia Trial, NIH = National Institutes of Health.

\*Andersen et al. did not report the type of events included or the criteria required for each type of event.

†Diagnostic tests include computed tomography scans, magnetic resonance imaging, angiography, surgery and autopsy.

‡Two of the 3 criteria must be met.

**References**

1. Hutten BA, Prins MH, Gent M, et al. Incidence of recurrent thromboembolic and bleeding complications among patients with venous thromboembolism in relation to both malignancy and achieved international normalized ratio: a retrospective analysis. *J Clin Oncol* 2000;18:3078-83.
2. Yasaka M, Minematsu K, Yamaguchi T. Optimal intensity of international normalized ratio in warfarin therapy for secondary prevention of stroke in patients with non-valvular atrial fibrillation. *Intern Med* 2001;40:1183-8.
3. Optimal oral anticoagulant therapy in patients with nonrheumatic atrial fibrillation and recent cerebral ischemia. The European Atrial Fibrillation Trial Study Group. *N Engl J Med* 1995;333:5-10.
4. Chimowitz MI, Lynn MJ, Howlett-Smith H, et al. Comparison of warfarin and aspirin for symptomatic intracranial arterial stenosis. *N Engl J Med* 2005;352:1305-16.
5. Andersen PV, Aagaard J. Low-dose warfarin in patients with Carbomedics heart valve prostheses. *Asian Cardiovasc Thorac Ann* 2000;8:11-4.
6. Torn M, Algra A, Rosendaal FR. Oral anticoagulation for cerebral ischemia of arterial origin: high initial bleeding risk. *Neurology* 2001;57:1993-9.
7. Cheung CM, Tsoi TH, Huang CY. The lowest effective intensity of prophylactic anticoagulation for patients with atrial fibrillation. *Cerebrovasc Dis* 2005;20:114-9.
8. ESPRIT Study Group; Algra A. Medium intensity oral anticoagulants versus aspirin after cerebral ischaemia of arterial origin (ESPRIT): a randomised controlled trial. *Lancet Neurol* 2007;6:115-24.
9. Poli D, Antonucci E, Lombardi A, et al. Low rate of bleeding and thrombotic complications of oral anticoagulant therapy independent of age in the real-practice of an anticoagulation clinic. *Blood Coagul Fibrinolysis* 2003;14:269-75.
10. Tangelder MJD, Algra A, Lawson JA, et al. Optimal oral anticoagulant intensity to prevent secondary ischemic and hemorrhagic events in patients after infrainguinal bypass graft surgery. *J Vasc Surg* 2001;33:522-7.
11. Kearon C, Ginsberg JS, Kovacs MJ, et al. Comparison of low-intensity warfarin therapy with conventional-intensity warfarin therapy for long-term prevention of recurrent venous thromboembolism. *N Engl J Med* 2003;349:631-9.
12. Casais P, Luceros AS, Meschengieser S, et al. Bleeding risk factors in chronic oral anticoagulation with acenocoumarol. *Am J Hematol* 2000;63:192-6.
13. Palareti G, Leali N, Coccheri S, et al. Bleeding complications of oral anticoagulant treatment: an inception-cohort, prospective collaborative study (ISCOAT). Italian Study on Complications of Oral Anticoagulant Therapy. *Lancet* 1996;348:423-8.
14. Van Walraven C, Oake N, Wells PS, et al. Burden of potentially avoidable anticoagulant-associated hemorrhagic and thromboembolic events in the elderly. *Chest* 2007;131:1508-15.
15. Azar AJ, Cannegieter SC, Deckers JW, et al. Optimal intensity of oral anticoagulant therapy after myocardial infarction. *J Am Coll Cardiol* 1996;27:1349-55.
16. Hylek EM, Go AS, Chang Y, et al. Effect of intensity of oral anticoagulation on stroke severity and mortality in atrial fibrillation. *N Engl J Med* 2003;349:1019-26.
17. Oden A, Fahlen M. Oral anticoagulation and risk of death: a medical record linkage study. *BMJ* 2002;325:1073-5.
18. Rosove MH, Brewer PM. Antiphospholipid thrombosis: clinical course after the first thrombotic event in 70 patients. *Ann Intern Med* 1992;117:303-8.
19. Palareti G, Manotti C, D'Angelo A, et al. Thrombotic events during oral anticoagulant treatment: results of the inception-cohort, prospective, collaborative ISCOAT study: ISCOAT study group (Italian Study on Complications of Oral Anticoagulant Therapy). *Thromb Haemost* 1997;78:1438-43.

Appendix 3 to Oake N, Jennings A, Forster A, et al. Anticoagulation intensity and outcomes among patients prescribed oral anticoagulant therapy: a systematic review and meta-analysis. *CMAJ* 2008;179(3):235-44.
